# Supplementary material
Source: Springer Nature journal article supplement (https://www.springermedizin.de/resource/supplementary/12916_2012_580_MOESM1_ESM.pdf/9597926)
Supplement: MOESM1 [file 9597926]

Directory of Open Access Journals (DOAJ)  
7372 Journals

ISSN & eISSN identifiers

Cross-analysis of journal publication volumes  
(DOAJ - Web of Knowledge – Scimago/Scopus)

Division into strata

Journals  
(7269)

Classification criteria:  
Journals with unknown volume or < 200  
annual articles

Sampled through random sampling  
(n=684, observation weight 10.62719)

Large Journals  
(103)

Classification criteria:  
Journals with > 200 annual articles

Sampled in full  
(n=103, observation weight 1)

Data collection

Journal article volumes 2000-2011: Journal websites, ISI WoK, Scimago/Scopus  
Journal discipline & publisher country: DOAJ  
Article-processing charge: Journal websites, DOAJ
